# Supplementary material for: An easily synthesized AIE luminogen for lipid droplet-specific super-resolution imaging and two-photon imaging
Source: Royal Society of Chemistry journal article supplement (doi:10.1039/d0qm00682c), 2020-12-10

## **Supporting Information**

### **An easily-synthesized AIE luminogen for lipid droplets-specific super-resolution imaging and two-photon imaging**

*Yanzi Xu,<sup>[a,‡]</sup> Haoke Zhang,<sup>[b,‡]</sup> Ning Zhang,<sup>[a,‡]</sup> Ruohan Xu,<sup>[a]</sup> Zhi Wang,<sup>[a]</sup> Yu Zhou,<sup>[a,c]</sup> Qifei Shen,<sup>[a]</sup> Dongfeng Dang,<sup>[a,\*]</sup> Lingjie Meng,<sup>[a,c,\*]</sup> Ben Zhong Tang<sup>[b,\*]</sup>*

<sup>[a]</sup> School of Chemistry, MOE Key Laboratory for Non-equilibrium Synthesis and Modulation of Condensed Matter, Xi'an Key Laboratory of Sustainable Energy Material Chemistry, Xi'an Jiao Tong University, Xi'an 710049, P. R. China.

<sup>[b]</sup> Department of Chemistry, The Hong Kong University of Science and Technology, Hong Kong, P. R. China.

<sup>[c]</sup> Instrumental analysis center, Xi'an Jiao Tong University, Xi'an, 710049, P. R. China.

E-mails: dongfengdang@xjtu.edu.cn, menglingjie@xjtu.edu.cn  
tangbenz@ust.hk

‡ Y. Xu, H. Zhang and N. Zhang contributed equally to this manuscript.

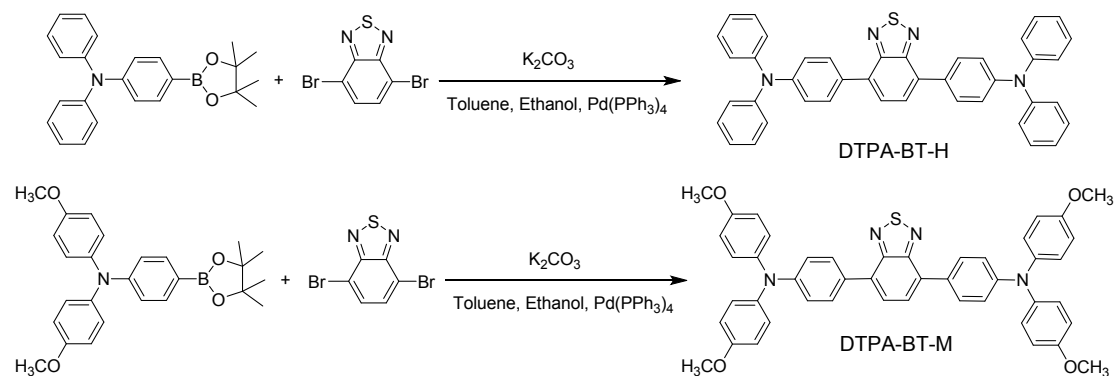

**Scheme S1.** Synthetic routes to DTPA-BT-H and DTPA-BT-M.

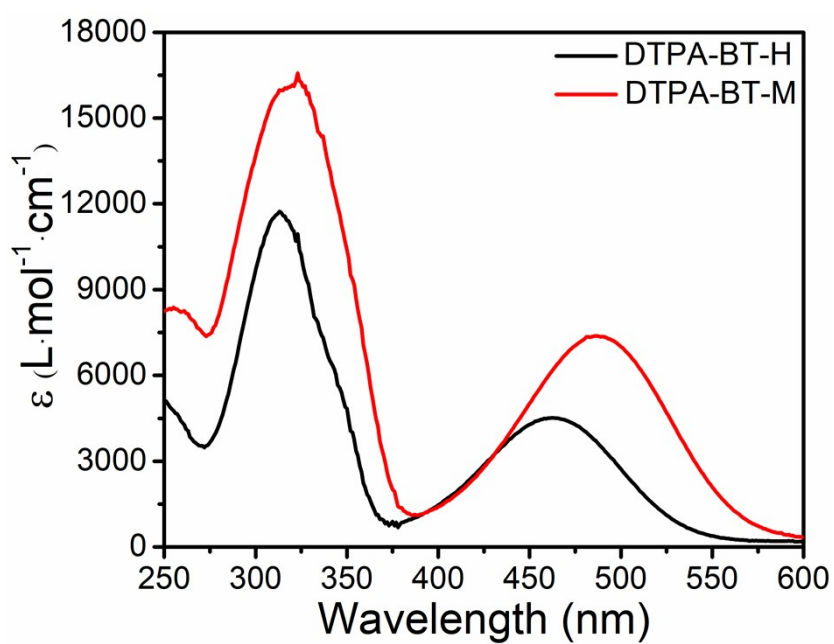

**Figure S1.** UV-Vis absorption spectra and molar absorption coefficient of DTPA-BT-H and DTPA-BT-M in dilute THF solution ( $[c]=1\times 10^{-5}$  mol/L).

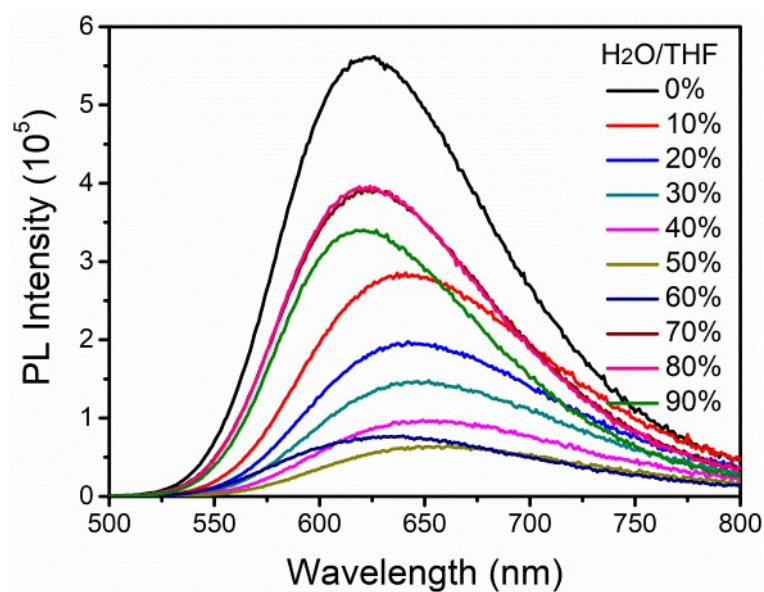

**Figure S2.** PL spectra of DTPA-BT-H in a THF/water mixture with different water fraction ( $[c]=1\times 10^{-5}$  mol/L).

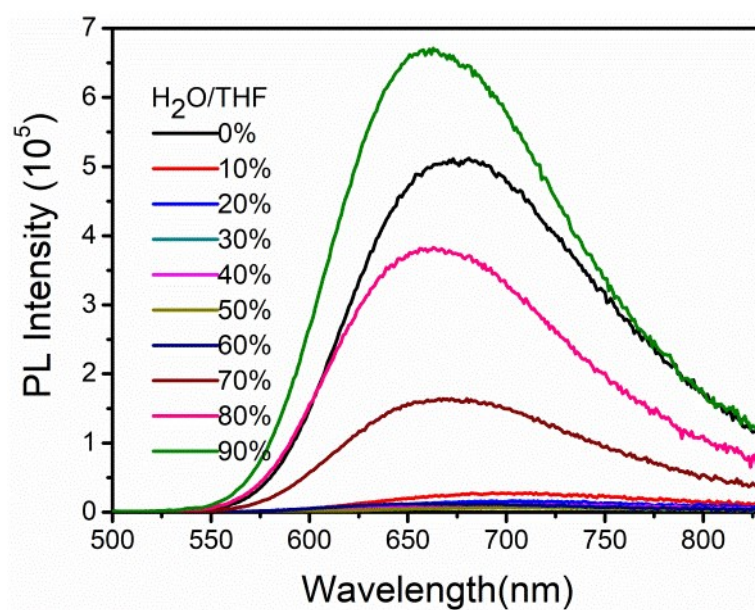

**Figure S3.** PL spectra of DTPA-BT-M in a THF/water mixture with different water fraction ( $[c]=1\times 10^{-5}$  mol/L).

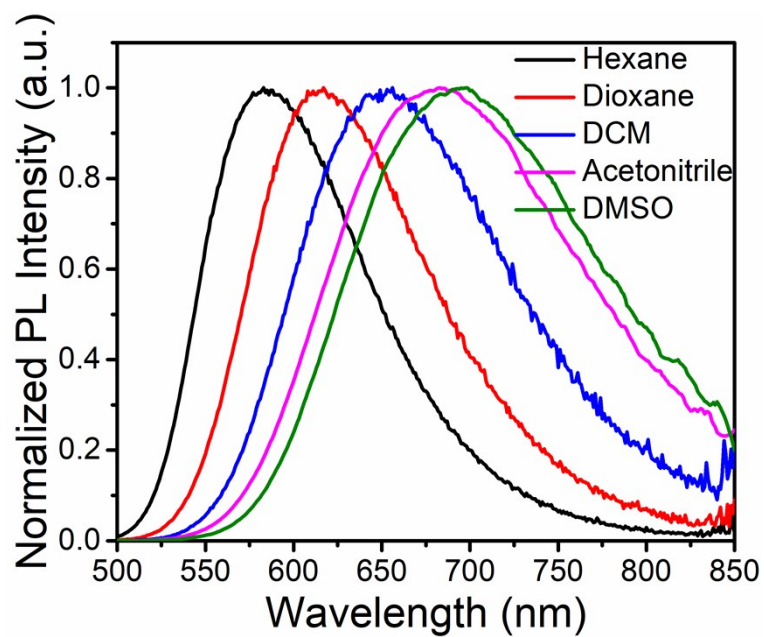

**Figure S4.** Normalized PL spectra of DTPA-BT-H in solvents with varied polarities.

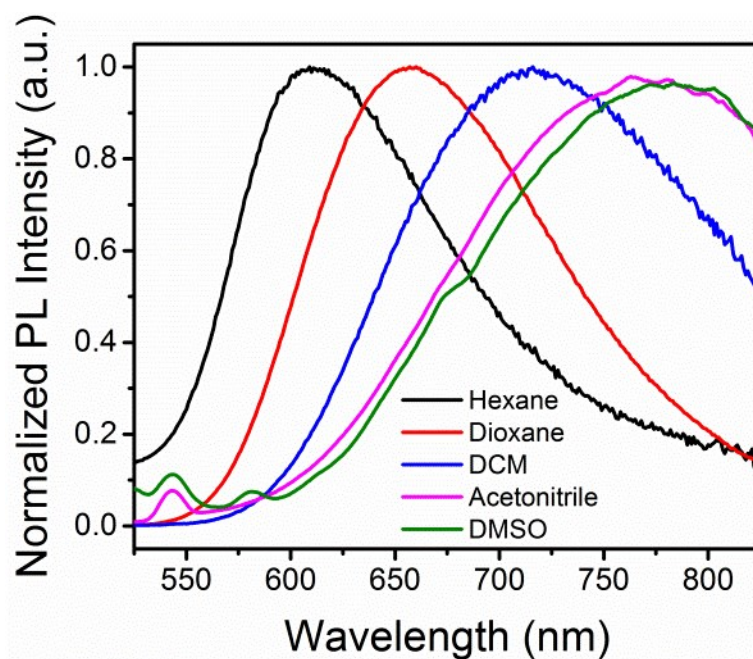

**Figure S5.** Normalized PL spectra of DTPA-BT-M in solvents with varied polarities.

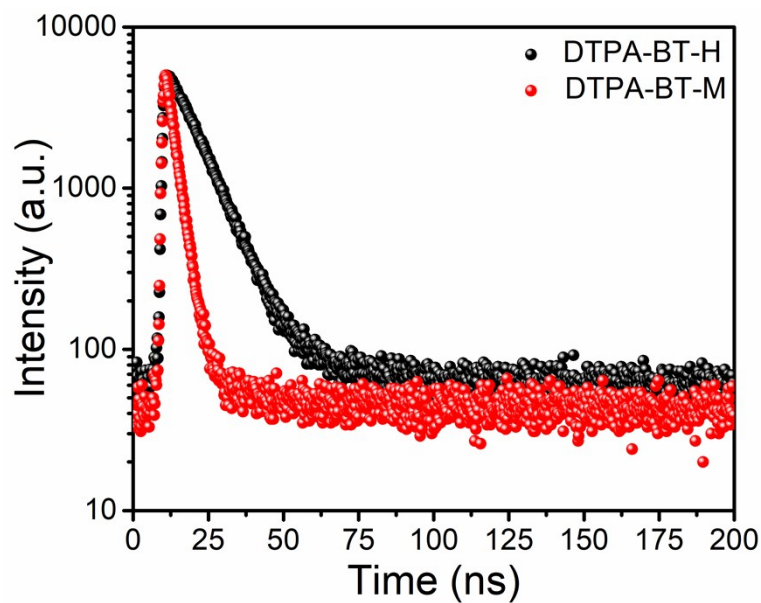

**Figure S6.** Transient decay spectra of DTPA-BT-H and DTPA-BT-M in dilute THF solution ( $[c]=1\times 10^{-5}$  mol/L).

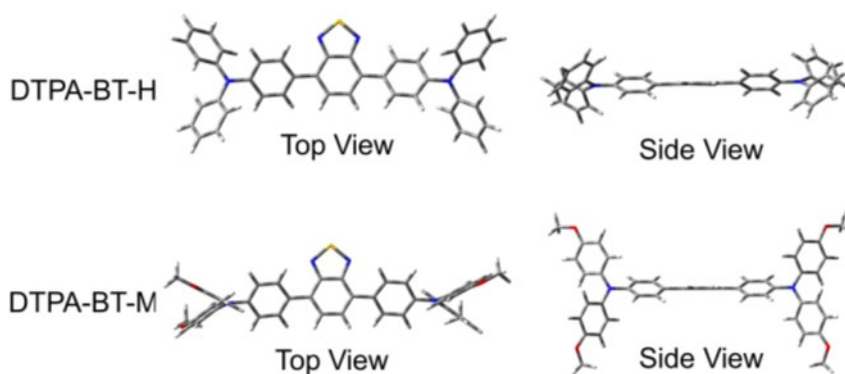

**Figure S7.** The calculated geometries of DTPA-BT-H and DTPA-BT-M in excited states (including top view and side view).

|                | Degree<br>(°) | DTPA-BT-H      |                |
|----------------|---------------|----------------|----------------|
|                |               | S <sub>0</sub> | S <sub>1</sub> |
| S <sub>1</sub> | 1-N           | 42             | 41             |
|                | 2-N           | 45             | 40             |
|                | 3-N           | 38             | 39             |
|                | 3-4           | 35             | 23             |
|                | 4-5           | 35             | 23             |
|                | 5-N           | 38             | 39             |
|                | 6-N           | 45             | 41             |
| S <sub>0</sub> | 7-N           | 42             | 40             |

**Figure S8.** The conformational change of DTPA-BT-H from ground state (S<sub>0</sub>) to excited state (S<sub>1</sub>).

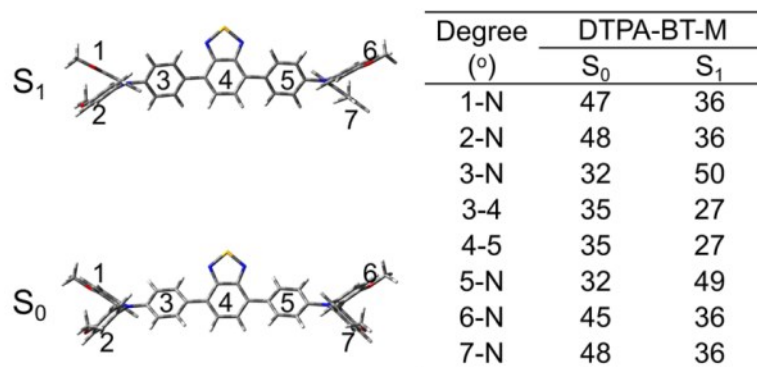

**Figure S9.** The conformational change of DTPA-BT-M from ground state (S<sub>0</sub>) to excited state (S<sub>1</sub>).

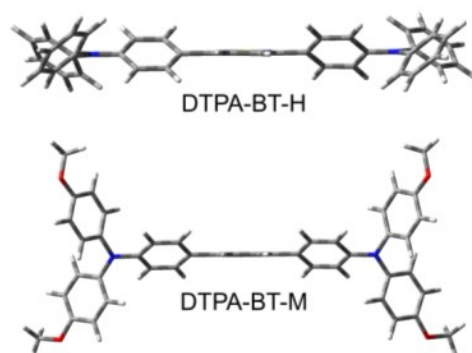

**Figure S10.** The single crystal structure of DTPA-BT-H and DTPA-BT-M in side view.

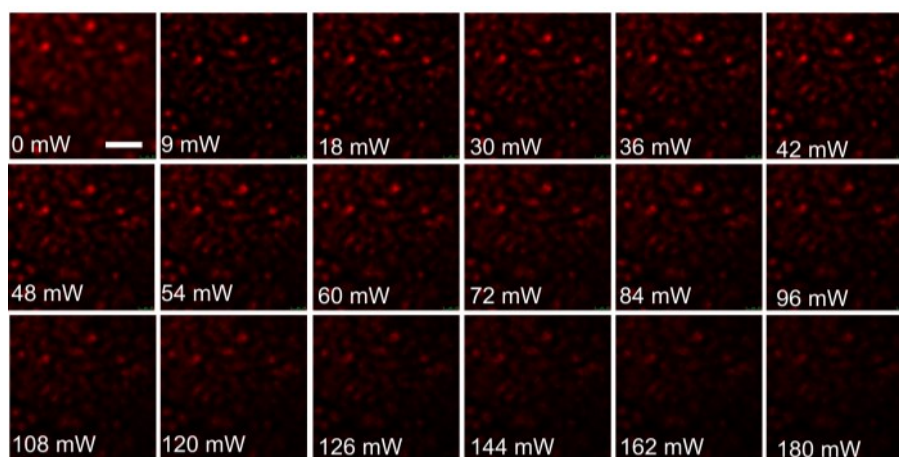

**Figure S11.** Power-dependent fluorescent images for DTPA-BT-H on AAO mask under the irradiation of STED beam (Scale bar = 2 μm).



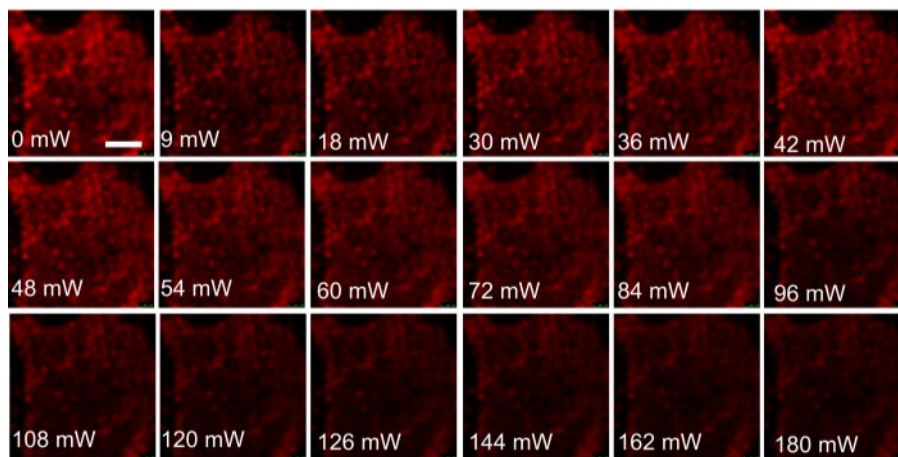

**Figure S12.** Power-dependent fluorescent images for DTPA-BT-M on AAO mask under the irradiation of STED beam (Scale bar = 2  $\mu\text{m}$ ).

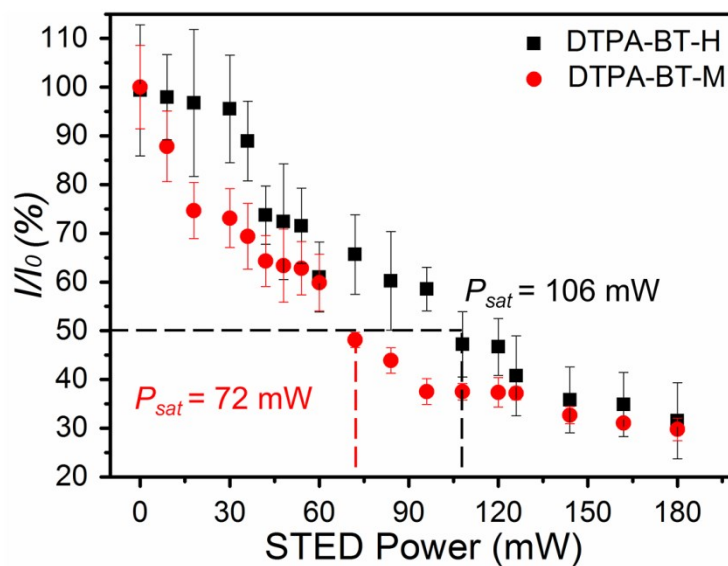

**Figure S13.** Plots of relative fluorescence intensity ( $I/I_0$ ) for DTPA-BT-H and DTPA-BT-M on AAO mask under different STED power.

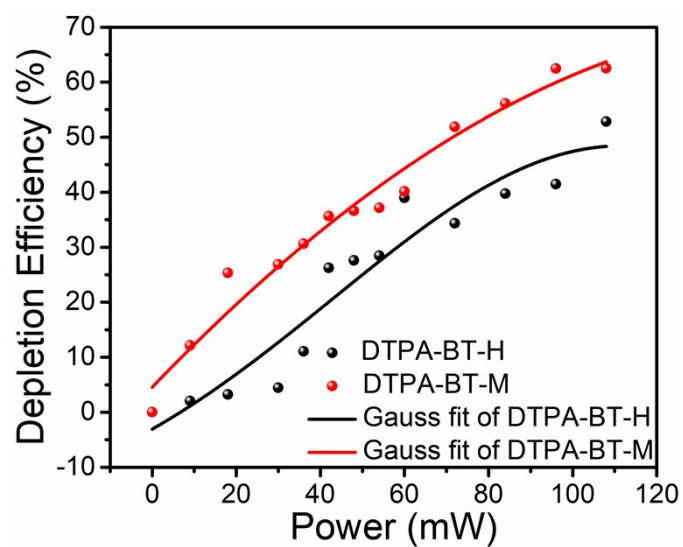

**Figure S14.** The fitting curve for depletion efficiency of DTPA-BT-H and DTPA-BT-M under various powers in STED nanoscopy.

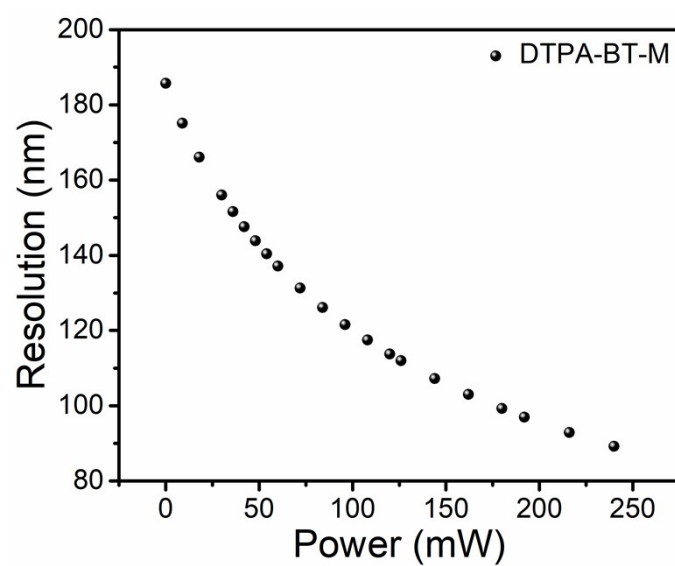

**Figure S15.** The calculated resolution for DTPA-BT-M under various STED power.



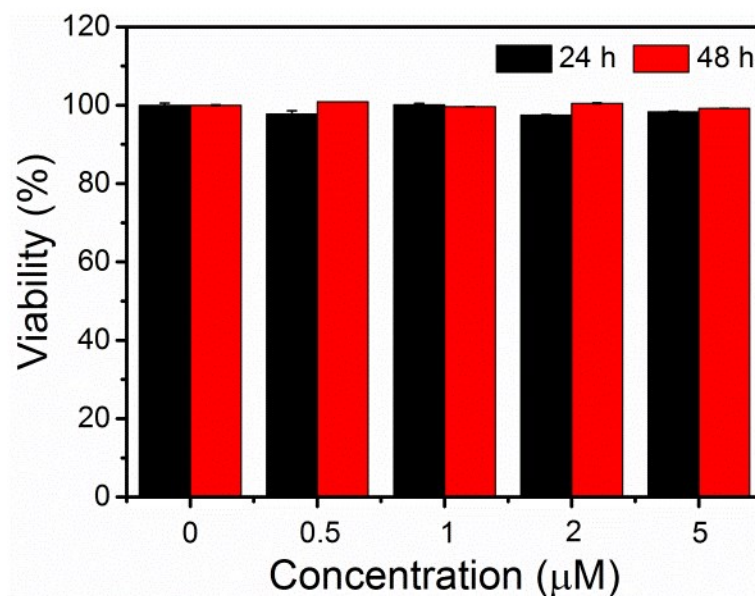

**Figure S16.** The viability of LO<sub>2</sub> cells after incubated with DTPA-BT-M for 24 h and 48 h under different concentration.

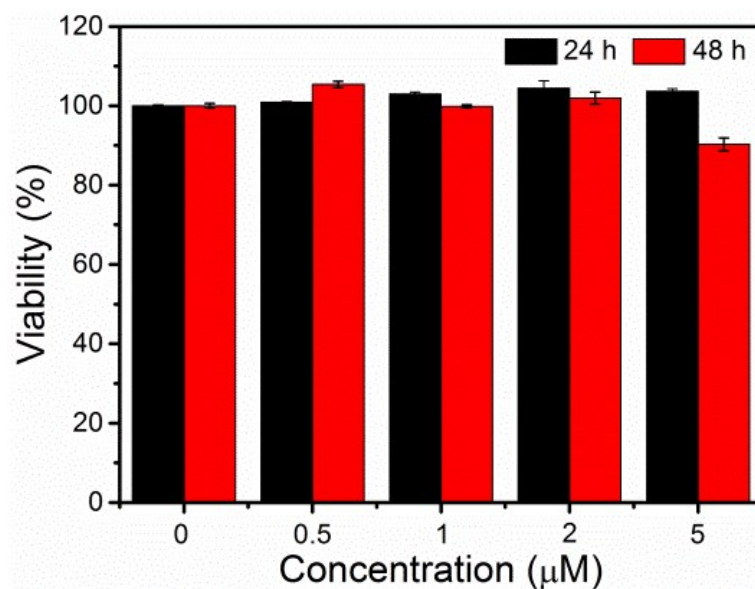

**Figure S17.** The viability of HeLa cells after incubated with DTPA-BT-M for 24 h and 48 h under different concentration.

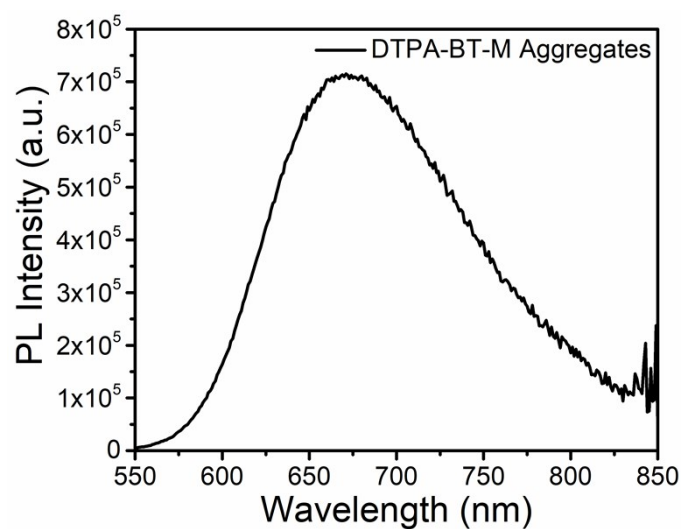

**Figure S18.** The PL spectra of DTPA-BT-M in DMSO and PBS solution for cell cultures.

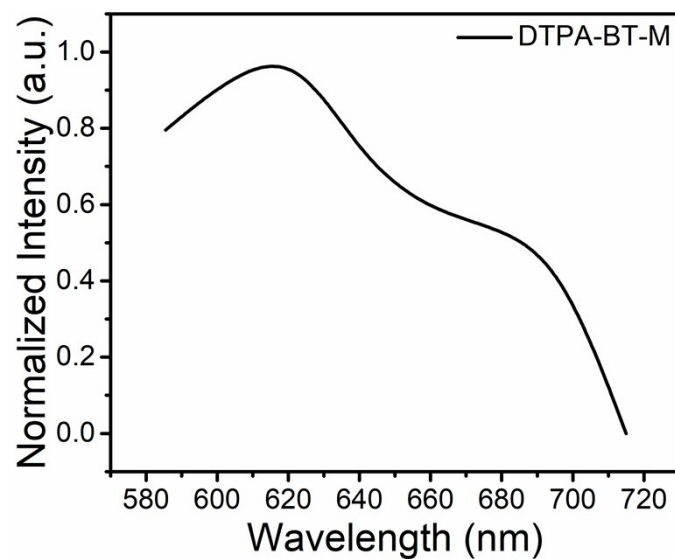

**Figure S19.** The PL spectra of DTPA-BT-M in HeLa cells.

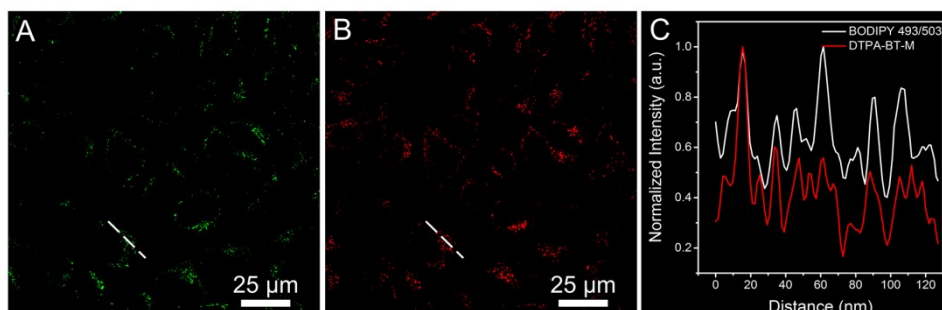

**Figure S20.** Confocal images of HeLa cells stained with BODIPY 493/503 (A), DTPA-BT-M (B) and their corresponding co-location profile by A and B (C).

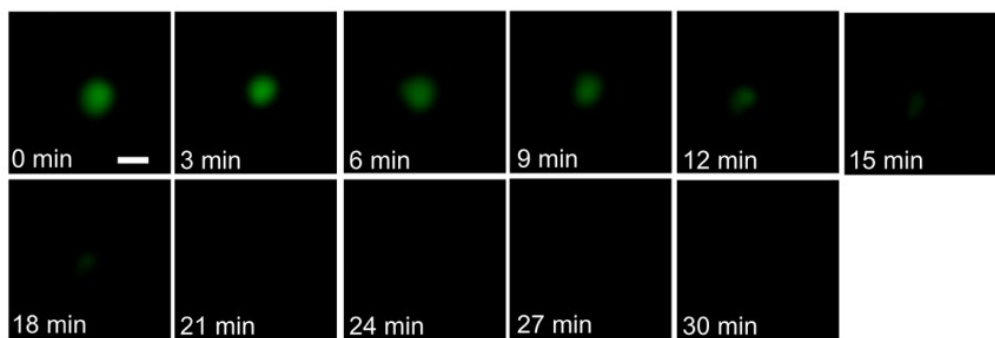

**Figure S21.** Time-dependent fluorescent images for BODIPY 493/503 stained HeLa cells under the irradiation of STED beam (Scale bar = 300 nm).

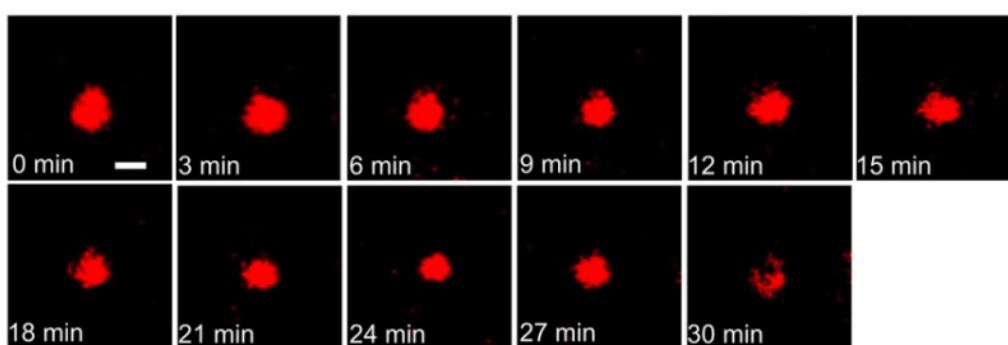

**Figure S22.** Time-dependent fluorescent images for DTPA-BT-M stained HeLa cells under the irradiation of STED beam (Scale bar = 300 nm).

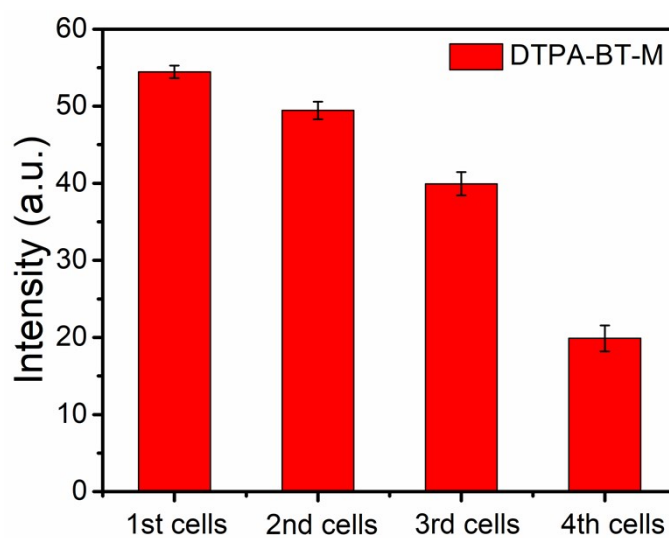

**Figure S23.** Fluorescent intensity for DTPA-BT-M-stained cells over various generations.

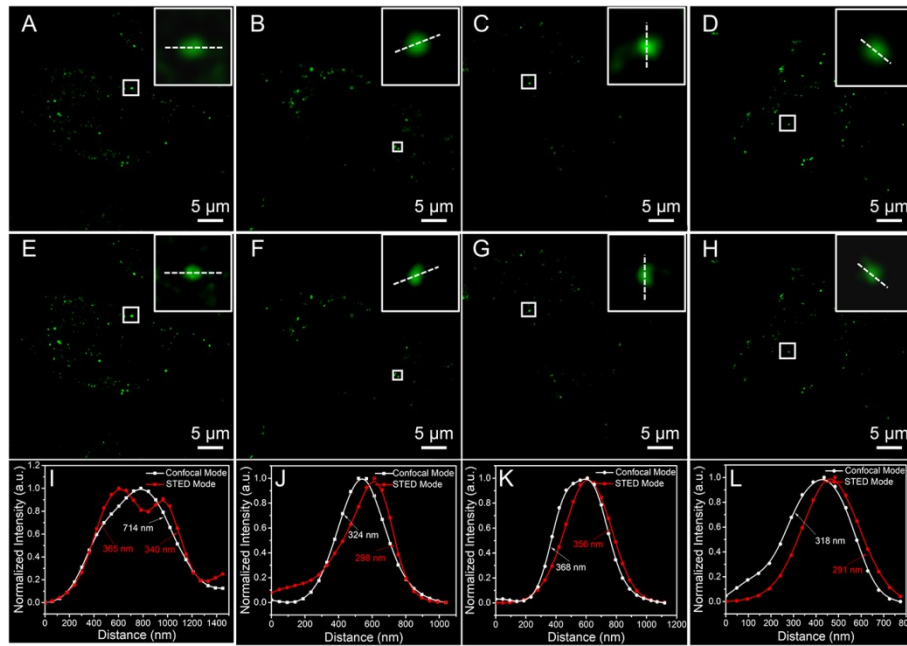

**Figure S24.** Fluorescence images by CLSMs (A-D) and STED nanoscopy (E-H) in long-term cellular tracking by using BODIPY 493/503; Fluorescence intensity along the white line in captured images by CLSMs and STED nanoscopy, and their corresponding FWHM values (I-L).

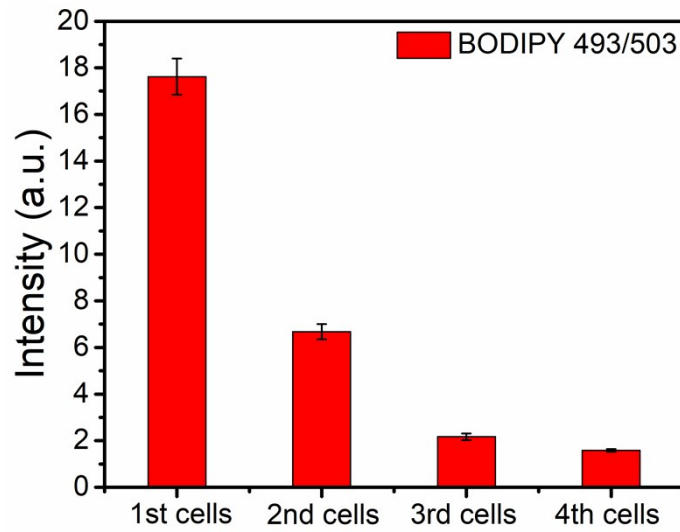

**Figure S25.** Fluorescent intensity for BODIPY 493/503-stained cells over various generations.

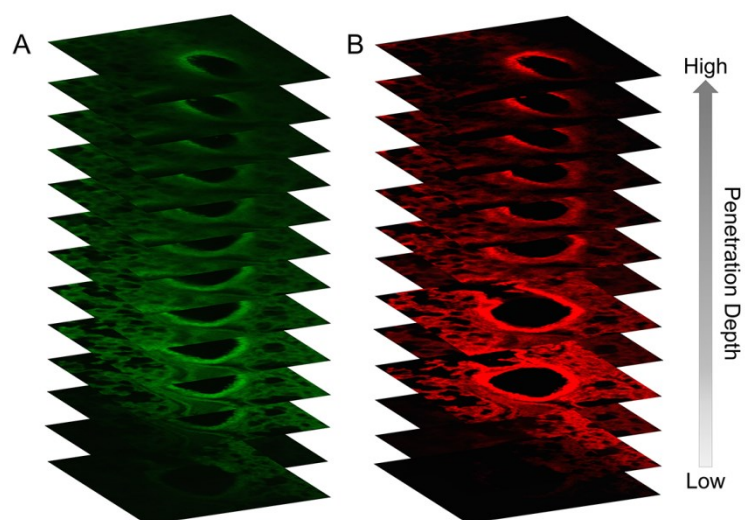

**Figure S26.** Fluorescence images of DTPA-BT-M stained lung tissue in one-photon mode (A) and two-photon mode (B) at different penetration depth.

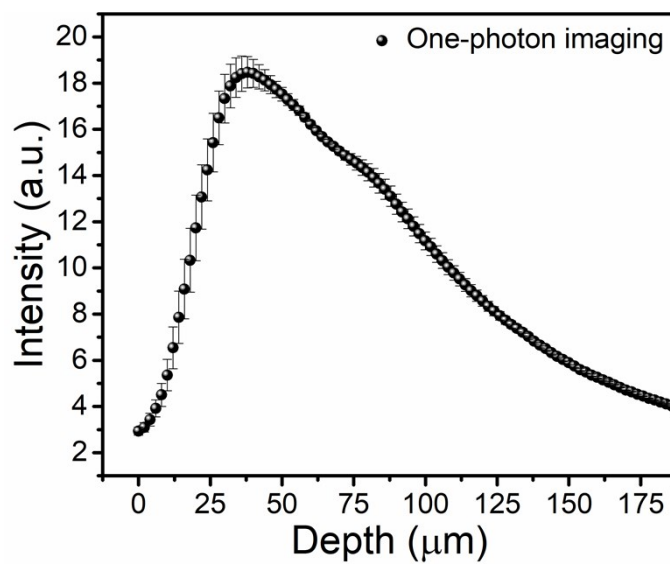

**Figure S27.** The fluorescent intensity curve for DTPA-BT-M at various penetration depths in one-photon imaging.

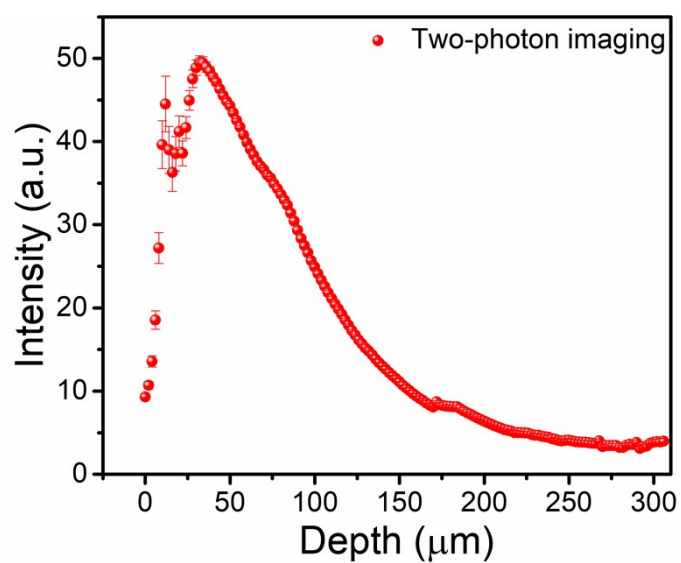

**Figure S28.** The fluorescent intensity curve for DTPA-BT-M at various penetration depths in two-photon imaging.



**Table S1.** The  $\delta_{2PA}$  of typical AIEgens for two-photon fluorescence microscopy.

| Sample                            | Ex      | $\delta_{2PA}$        |
|-----------------------------------|---------|-----------------------|
| TBP- <i>b</i> -TPA <sup>[a]</sup> | 1040 nm | 207±7 GM              |
| CDPP-4SO3 <sup>[b]</sup>          | 820 nm  | 162 GM                |
| BTPETQ dots <sup>[c]</sup>        | 1200 nm | $7.63 \times 10^4$ GM |
| TP <sup>[d]</sup>                 | 840 nm  | 265 MG                |
| TQ-BPN <sup>[e]</sup>             | 1300 nm | $1.22 \times 10^3$ GM |
| DTPA-BT-M <sup>[f]</sup>          | 840 nm  | 1581 GM               |

<sup>[a]</sup> Angew. Chem. Int. Ed. 2020, 59, 12822; <sup>[b]</sup> Adv. Funct. Mater. 2020, 30, 1909268;

<sup>[c]</sup> Adv. Mater. 2019, 31, 1904447; <sup>[d]</sup> Nano Res. 2019, 12, 1703; <sup>[e]</sup> ACS Nano 2018, 12, 7936; <sup>[f]</sup> our work.

# NMR and MS spectra

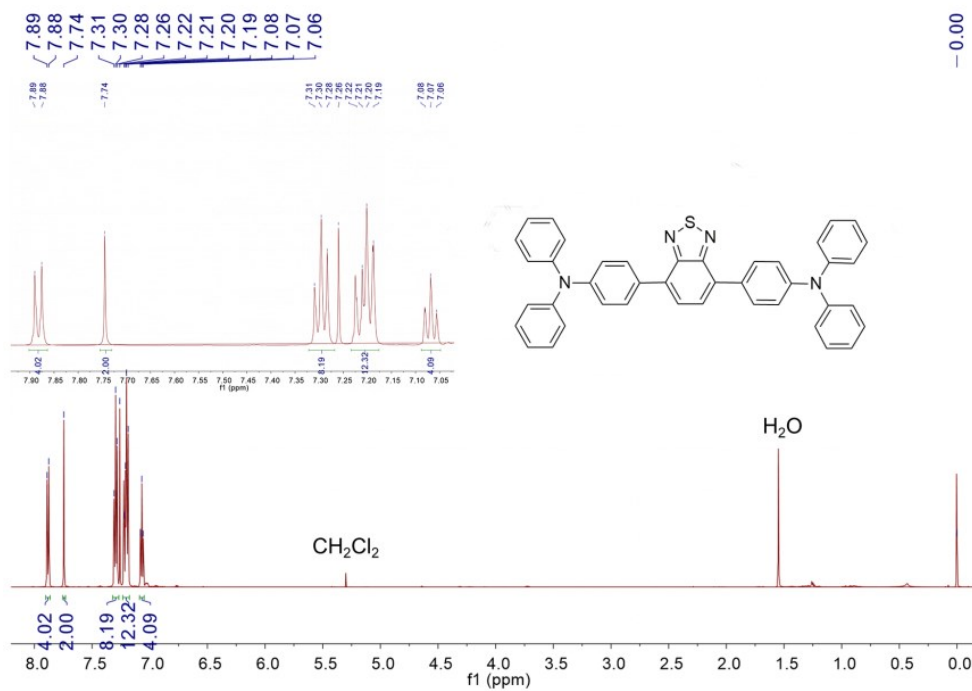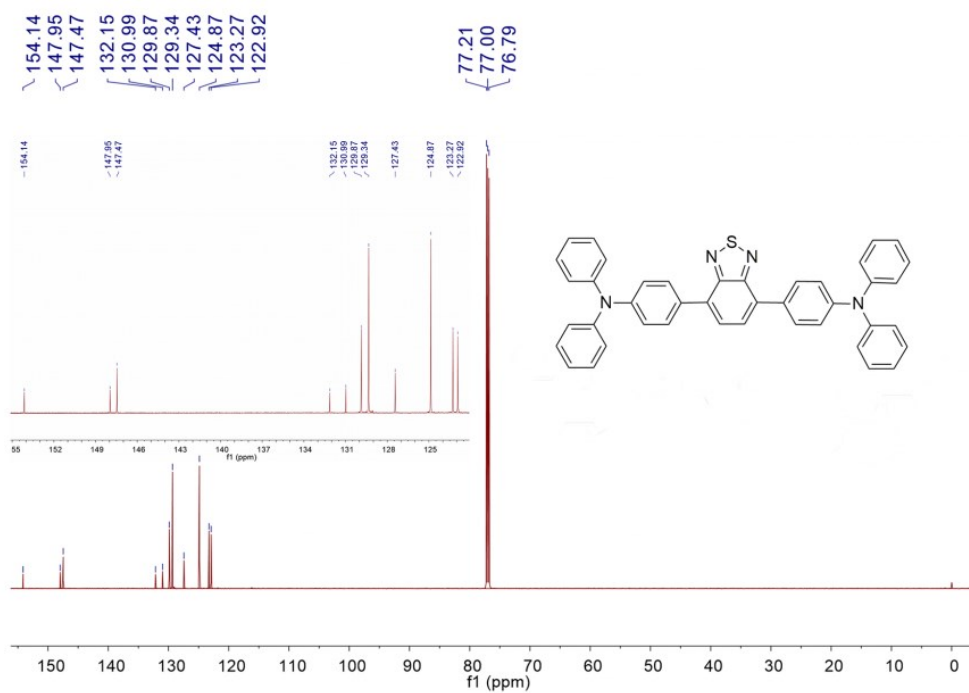

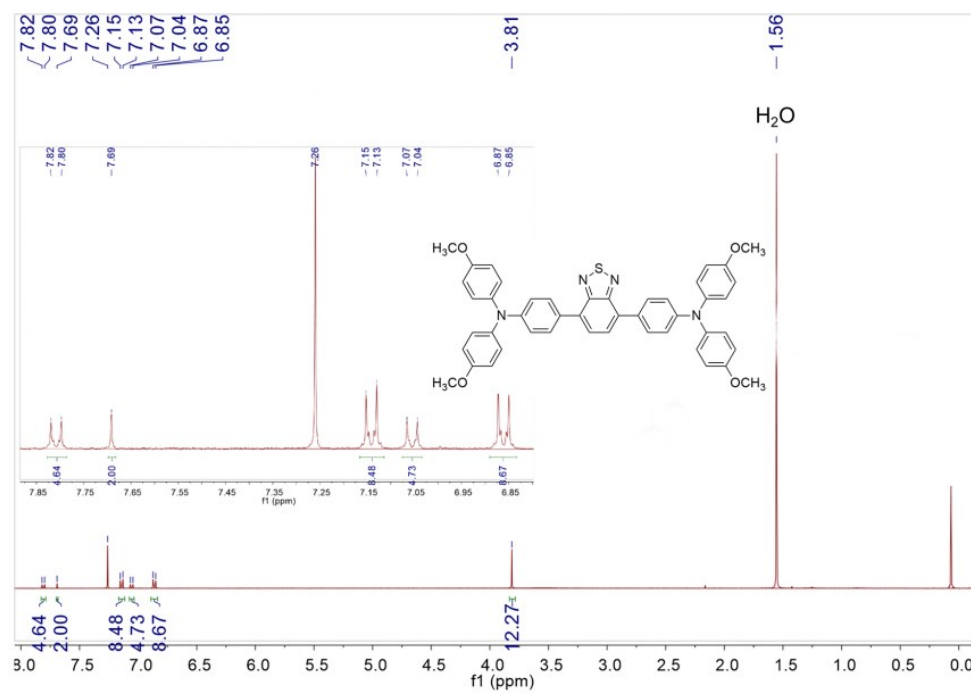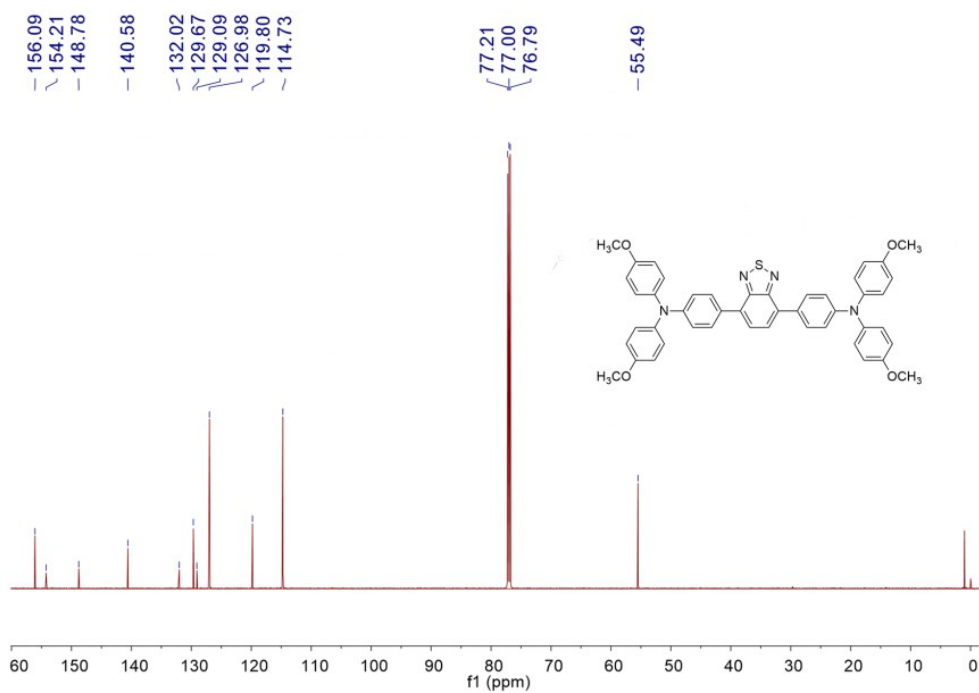

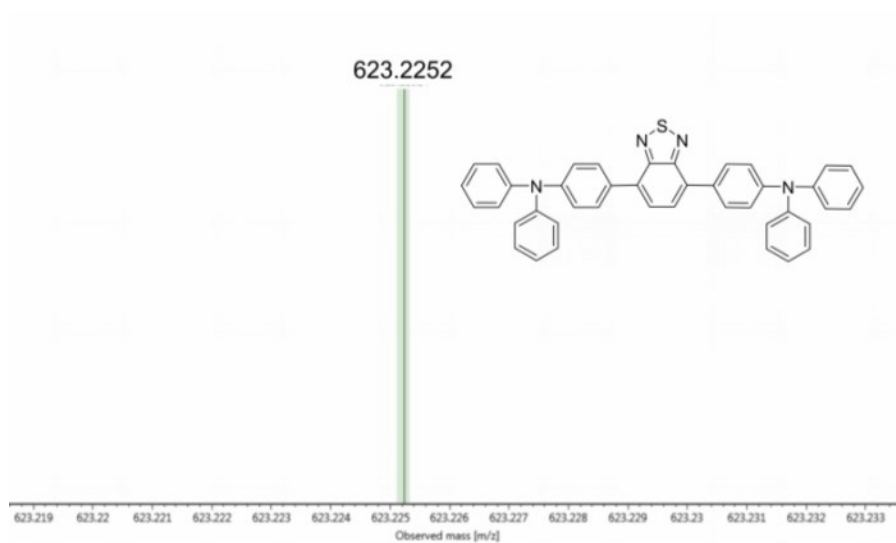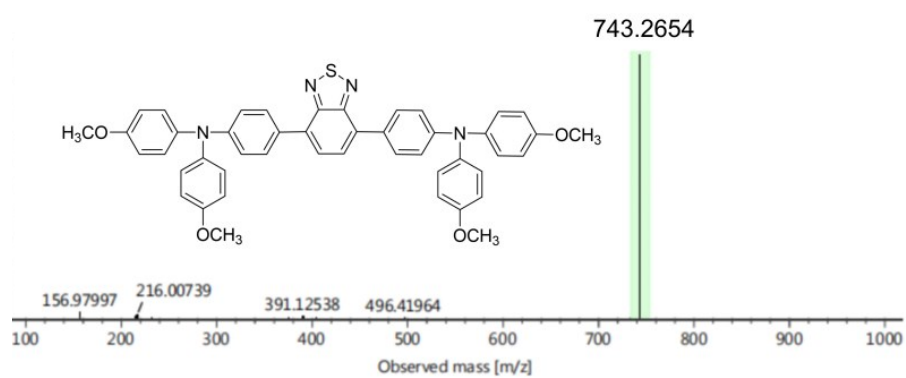

Supplement: d0qm00682c1.pdf [file d0qm00682c1.pdf]
